# Supplementary material for: Association between hypotension and serious illness in the emergency department: an observational study
Source: PubMed Central journal article supplement (PMC7285787; doi:10.1136/archdischild-2018-316231), 2019-04-04
Supplement: archdischild-2018-316231supp001.pdf [file archdischild-2018-316231supp001.pdf]

## Supplemental information

## Appendix 1 – Definitions of tachycardia

**Table 1** Definitions of tachycardia per different age groups in heart rate/minute

---

| <b>APLS(1)</b> |      |
|----------------|------|
| 0-3 m          | >170 |
| 3 m-1.5 y      | >160 |
| 1.5 y-2 y      | >155 |
| 2-3 y          | >150 |
| 3-4 y          | >140 |
| 4-6 y          | >135 |
| 6-8 y          | >130 |
| 8-12 y         | >120 |
| 12-14 y        | >115 |
| >14 y          | >110 |

---

| <b>PEWS (2)</b> |            |
|-----------------|------------|
| 0 -3 m          | $\geq 150$ |
| 3- 12 m         | $\geq 150$ |
| 1- 4 y          | $\geq 120$ |
| 4-12 y          | $\geq 110$ |
| >12 y           | $\geq 100$ |

---

| <b>Septic shock identification tool(3)</b> |      |
|--------------------------------------------|------|
| 0- 3 m                                     | >205 |
| $\geq 3m - 2 y$                            | >190 |
| $\geq 2 - 10 y$                            | >140 |
| $\geq 10 - 13 y$                           | >100 |
| > 13y                                      | >100 |

---

m, month; y, year

## Appendix 2 – Definition of high shock index APLS

**Table 2** Cut off high shock index according to APLS  
(hypotension value/tachycardia value)

---

|                    |      |
|--------------------|------|
| <4 weeks           | 2.27 |
| 4 weeks - 6 weeks  | 2.27 |
| 6 weeks - 3 months | 2.27 |
| 3-6 months         | 2.13 |
| 6-12 months        | 2.13 |
| 1-1.5 years        | 2.13 |
| 1.5-2 years        | 2.07 |
| 2-3 years          | 1.88 |
| 3-4 years          | 1.75 |
| 4-5 years          | 1.69 |
| 5-6 years          | 1.50 |
| 6-7 years          | 1.44 |
| 7-8 years          | 1.44 |
| 8-10 years         | 1.33 |
| 10-12 years        | 1.28 |
| 12-13 years        | 1.10 |
| 13-14 years        | 1.10 |
| 14-16 years        | 1.05 |

---

### Appendix 3 – Characteristics patients with no blood pressure/heart rate measurement

**Table 3** Characteristics of patients without blood pressure and heart rate measurement

|                                    | <b>N=34,763</b>  |
|------------------------------------|------------------|
| <b>Male; n %</b>                   | 20,444 (58.8)    |
| <b>Age in years; median, (IQR)</b> | 3.40 (1.16-8.45) |
| <b>Age category; n (%)</b>         |                  |
| 0 - 1 year                         | 7799 (22.4)      |
| 1 - 2 years                        | 5067 (14.6)      |
| 2 - 5 years                        | 8057 (23.2)      |
| 5 - 12 years                       | 9394 (27.0)      |
| 12 - 16 years                      | 4446 (12.8)      |
| <b>MTS urgency; n (%)</b>          |                  |
| Emergent / Very urgent             | 3828 (11.0)      |
| Urgent                             | 14847 (42.7)     |
| Standard/ Non urgent               | 14786 (42.5)     |
| Missing                            | 1299 (3.7)       |
| <b>Disposition; n (%)</b>          |                  |
| Admission general ward             | 5572 (16.0)      |
| Intensive care                     | 501 (1.4)        |
| Died                               | - <sup>1</sup>   |
| Discharge                          | 28194 (81.1)     |
| Other                              | 340 (1.0)        |
| Missing                            | 156 (0.4)        |

IQR, interquartile range; MTS, Manchester Triage System

<sup>1</sup>Children who died were excluded

## Appendix 4 – Frequencies of hypotension and tachycardia

**Table 4** Frequencies of hypotension and tachycardia according to 3 different cut-offs (N=10,698)

| <b>Hypotension; n (%)</b>        |             |
|----------------------------------|-------------|
| APLS                             | 504 (4.7)   |
| PALS/septic shock screening tool | 133 (1.2)   |
| PEWS by Parshuram                | 571 (5.3)   |
| <b>Tachycardia; n (%)</b>        |             |
| APLS                             | 1692 (15.8) |
| PALS/septic shock screening tool | 1709 (18.0) |
| PEWS by Parshuram                | 4113 (38.4) |

## Appendix 5 – Area under the curve (AUC) for the receiver operating characteristics with 95% CI for shock index

**Table 5** Area under the curve (AUC) for the receiver operating characteristics with 95% CI for shock index

|                      | ICU admission    | Hospital admission |
|----------------------|------------------|--------------------|
| All ages             | 0.63 (0.60-0.65) | 0.63 (0.60-0.65)   |
| 0-2 years (n=1588)   | 0.63 (0.58-0.67) | 0.62 (0.59-0.64)   |
| 2-10 years (n=5011)  | 0.56 (0.52-0.60) | 0.58 (0.56-0.59)   |
| 10-16 years (n=4099) | 0.59 (0.54-0.64) | 0.58 (0.56-0.59)   |

CI, confidence interval; ICU, Intensive care unit

## Appendix 6 – Predictive value for high cut-offs of shock index

**Table 6** Predictive value for cut-offs of shock index according to different age groups

|                           | Shock index Cut-off* | Sensitivity (95% CI) | Specificity (95% CI) | Positive likelihood ratio (95% CI) | Negative likelihood ratio (95% CI) |
|---------------------------|----------------------|----------------------|----------------------|------------------------------------|------------------------------------|
| <b>ICU admission</b>      |                      |                      |                      |                                    |                                    |
| 0-2 years (n=1588)        | 1.63                 | 0.42 (0.35-0.49)     | 0.79 (0.77-0.81)     | 2.00 (1.65-2.44)                   | 0.74 (0.65-0.83)                   |
| 2-10 years (n=5011)       | 1.18                 | 0.36 (0.79-0.81)     | 0.80 (0.79-0.81)     | 1.83 (1.53-2.18)                   | 0.79 (0.72-0.88)                   |
| 10-16 years (n=4099)      | 1.05                 | 0.27 (0.21-0.34)     | 0.91 (0.91-0.92)     | 3.16 (2.45-4.07)                   | 0.79 (0.73-0.87)                   |
| <b>Hospital admission</b> |                      |                      |                      |                                    |                                    |
| 0-2 years (n=1588)        | 1.45                 | 0.48 (0.45-0.51)     | 0.72 (0.69-0.76)     | 1.74 (1.52-1.99)                   | 0.72 (0.67-0.78)                   |
| 2-10 years (n=5011)       | 1.13                 | 0.34 (0.32-0.37)     | 0.79 (0.77-0.80)     | 1.63 (1.49-1.79)                   | 0.83 (0.80-0.86)                   |
| 10-16 years (n=4099)      | 0.91                 | 0.30 (0.28-0.33)     | 0.82 (0.81-0.84)     | 1.73 (1.54-1.94)                   | 0.84 (0.81-0.88)                   |

CI, confidence interval; ICU, intensive care unit

\*Cut-off value determined by Youden's index

## Appendix 7 Predictive value of high shock index: cut-off defined by APLS abnormal vital signs

**Table 7** Predictive value of high shock index cut-off by APLS\*

|                           | Sensitivity<br>(95% CI) | Specificity<br>(95% CI) | Positive likelihood<br>ratio (95% CI) | Negative likelihood<br>ratio (95% CI) |
|---------------------------|-------------------------|-------------------------|---------------------------------------|---------------------------------------|
| <b>ICU admission</b>      |                         |                         |                                       |                                       |
| Total                     | 0.14 (0.11-0.17)        | 0.96 (0.96-0.97)        | 3.86 (3.1-4.8)                        | 0.89 (0.87-0.92)                      |
| Ill appearance            | 0.22 (0.17-0.28)        | 0.92 (0.90-0.93)        | 2.71 (1.95-3.75)                      | 0.85 (0.79-0.92)                      |
| Fever                     | 0.20 (0.14-0.28)        | 0.92 (0.91-0.93)        | 2.49 (1.71-3.65)                      | 0.87 (0.79-0.95)                      |
| Surgical                  | 0.04 (0.02-0.08)        | 0.99 (0.99-0.00)        | 4.80 (1.74-13.3)                      | 0.97 (0.94-1.0)                       |
| <b>Hospital admission</b> |                         |                         |                                       |                                       |
| Total                     | 0.08 (0.07-0.08)        | 0.98 (0.97-0.98)        | 3.33 (2.75-4.03)                      | 0.95 (0.94-0.96)                      |
| Ill appearance            | 0.13 (0.11-0.15)        | 0.96 (0.94-0.97)        | 3.03 (1.95-4.72)                      | 0.91 (0.88-0.94)                      |
| Fever                     | 0.15 (0.13-0.17)        | 0.95 (0.94-0.96)        | 3.23 (2.48-4.22)                      | 0.89 (0.87-0.92)                      |
| Surgical                  | 0.02 (0.01-0.03)        | 0.99 (0.99-0.99)        | 2.79 (1.05-7.41)                      | 0.99 (0.98-1)                         |

CI, confidence interval; ICU, intensive care unit

\*APLS cut-off calculated by dividing APLS tachycardia value to APLS hypotension value for each age group

**Appendix 8** Results of subgroup analysis in children with fever, ill appearance, surgical.

**Table 8** Predictive value (95% CI) for hypotension and/or tachycardia for ICU admission for subgroups: fever, ill appearance, surgical

|                                                                                | Fever (n=2,678)     |                     |                                             |                                             | Ill appearance (n=1,436) |                     |                                             |                                             | Surgical (n=1,912)   |                     |                                             |                                             |
|--------------------------------------------------------------------------------|---------------------|---------------------|---------------------------------------------|---------------------------------------------|--------------------------|---------------------|---------------------------------------------|---------------------------------------------|----------------------|---------------------|---------------------------------------------|---------------------------------------------|
|                                                                                | Sens<br>(95% CI)    | Spec<br>(95% CI)    | Positive<br>likelihood<br>ratio<br>(95% CI) | Negative<br>likelihood<br>ratio<br>(95% CI) | Sens<br>(95% CI)         | Spec<br>(95% CI)    | Positive<br>likelihood<br>ratio<br>(95% CI) | Negative<br>likelihood<br>ratio<br>(95% CI) | Sens<br>(95% CI)     | Spec<br>(95% CI)    | Positive<br>likelihood<br>ratio<br>(95% CI) | Negative<br>likelihood<br>ratio<br>(95% CI) |
| <b>Predictive value for different cut-offs for hypotension</b>                 |                     |                     |                                             |                                             |                          |                     |                                             |                                             |                      |                     |                                             |                                             |
| APLS                                                                           | 0.11<br>(0.06-0.18) | 0.97<br>(0.96-0.97) | 3.19<br>(1.83-5.54)                         | 0.92<br>(0.87-0.98)                         | 0.13<br>(0.09-0.18)      | 0.95<br>(0.94-0.96) | 2.78<br>(1.78-4.33)                         | 0.91<br>(0.86-0.97)                         | 0.09<br>(0.05-0.14)  | 0.98<br>(0.97-0.98) | 3.94<br>(2.11-7.38)                         | 0.94<br>(0.89-0.98)                         |
| PALS / sepsis                                                                  | 0.08<br>(0.04-0.14) | 0.99<br>(0.99-0.99) | 5.35<br>(2.53-11.3)                         | 0.94<br>(0.89-0.99)                         | 0.08<br>(0.05-0.12)      | 0.99<br>(0.98-0.99) | 6.04<br>(3.04-12.0)                         | 0.93<br>(0.89-0.97)                         | 0.04<br>(0.02-0.08)  | 0.99<br>(0.99-0.99) | 7.81<br>(2.59-23.5)                         | 0.97<br>(0.94-1)                            |
| PEWS                                                                           | 0.13<br>(0.08-0.21) | 0.95<br>(0.95-0.96) | 2.89<br>(1.77-4.71)                         | 0.91<br>(0.85-0.98)                         | 0.15<br>(0.11-0.21)      | 0.94<br>(0.92-0.95) | 2.43<br>(1.63-3.62)                         | 0.91<br>(0.85-0.96)                         | 0.09<br>(0.06-0.16)  | 0.97<br>(0.96-0.98) | 3.18<br>(1.81-5.57)                         | 0.93<br>(0.88-0.98)                         |
| <b>Predictive value for different cut-offs for tachycardia</b>                 |                     |                     |                                             |                                             |                          |                     |                                             |                                             |                      |                     |                                             |                                             |
| APLS                                                                           | 0.56<br>(0.47-0.64) | 0.63<br>(0.61-0.65) | 1.49<br>(1.27-1.77)                         | 0.70<br>(0.57-0.86)                         | 0.44<br>(0.37-0.51)      | 0.64<br>(0.61-0.67) | 1.23<br>(1.03-1.46)                         | 0.87<br>(0.77-0.99)                         | 0.12 (0.08-<br>0.18) | 0.96<br>(0.95-0.97) | 2.91<br>(1.77-4.79)                         | 0.92<br>(0.86-0.98)                         |
| PALS / sepsis                                                                  | 0.41<br>(0.32-0.49) | 0.69<br>(0.69-0.70) | 1.30<br>(1.04-1.63)                         | 0.86<br>(0.74-1.00)                         | 0.32<br>(0.25-0.38)      | 0.69<br>(0.66-0.71) | 1.01<br>(0.81-1.26)                         | 0.99<br>(0.89-1.10)                         | 0.13 (0.09-<br>0.20) | 0.99<br>(0.99-0.99) | 20.3<br>(9.88-41.9)                         | 0.87<br>(0.82-0.93)                         |
| PEWS                                                                           | 0.86<br>(0.78-0.91) | 0.28<br>(0.26-0.29) | 1.19<br>(1.11-1.29)                         | 0.51<br>(0.32-0.79)                         | 0.70<br>(0.64-0.76)      | 0.34<br>(0.31-0.36) | 1.06<br>(0.96-1.17)                         | 0.88<br>(0.69-1.11)                         | 0.33 (0.25-<br>0.41) | 0.80<br>(0.78-0.82) | 1.65<br>(1.28-2.13)                         | 0.84<br>(0.75-0.95)                         |
| <b>Predictive value for different cut-offs for tachycardia AND hypotension</b> |                     |                     |                                             |                                             |                          |                     |                                             |                                             |                      |                     |                                             |                                             |
| APLS                                                                           | 0.08<br>(0.04-0.14) | 0.98<br>(0.98-0.99) | 4.57<br>(2.27-9.16)                         | 0.94<br>(0.89-0.99)                         | 0.09<br>(0.06-0.14)      | 0.98<br>(0.97-0.99) | 4.76<br>(2.59-8.75)                         | 0.93<br>(0.89-0.97)                         | NA*                  | NA*                 | NA*                                         | NA*                                         |
| PALS / sepsis                                                                  | 0.04<br>(0.02-0.09) | 0.99<br>(0.99-0.99) | 9.69<br>(3.42-27.4)                         | 0.96<br>(0.93-0.99)                         | 0.03<br>(0.01-0.07)      | 0.99<br>(0.990.99)  | 4.29<br>(1.55-11.9)                         | 0.98<br>(0.95-1.00)                         | NA*                  | NA*                 | NA*                                         | NA*                                         |
| PEWS                                                                           | 0.12<br>(0.07-0.19) | 0.97<br>(0.96-0.97) | 3.39<br>(1.99-5.78)                         | 0.92<br>(0.86-0.98)                         | 0.12<br>(0.08-0.17)      | 0.96<br>(0.95-0.97) | 3.09<br>(1.92-4.95)                         | 0.92<br>(0.87-0.97)                         | 0.05 (0.02-<br>0.09) | 0.99<br>(0.99-0.99) | 6.73<br>(2.73-16.6)                         | 0.96<br>(0.92-0.99)                         |
| <b>Predictive value for different cut-offs for tachycardia OR hypotension</b>  |                     |                     |                                             |                                             |                          |                     |                                             |                                             |                      |                     |                                             |                                             |
| APLS                                                                           | 0.59<br>(0.50-0.68) | 0.61<br>(0.59-0.63) | 1.52<br>(1.29-1.77)                         | 0.67<br>(0.54-0.83)                         | 0.48<br>(0.41-0.55)      | 0.61<br>(0.49-0.64) | 1.25<br>(1.06-1.46)                         | 0.85<br>(0.73-0.98)                         | 0.18 (0.12-<br>0.25) | 0.94<br>(0.93-0.95) | 2.89<br>(1.94-4.31)                         | 0.88<br>(0.81-0.95)                         |
| PALS / sepsis                                                                  | 0.44<br>(0.36-0.53) | 0.68<br>(0.66-0.69) | 1.39<br>(1.13-1.71)                         | 0.82<br>(0.69-0.96)                         | 0.36<br>(0.29-0.43)      | 0.68<br>(0.66-0.71) | 1.14<br>(0.93-1.39)                         | 0.94<br>(0.84-1.05)                         | 0.15 (0.09-<br>0.22) | 0.93<br>(0.92-0.94) | 2.24<br>(1.46-3.45)                         | 0.91<br>(0.85-0.98)                         |
| PEWS                                                                           | 0.88<br>(0.80-0.92) | 0.27<br>(0.25-0.29) | 1.19<br>(1.11-1.29)                         | 0.47<br>(0.29-0.75)                         | 0.74<br>(0.67-0.79)      | 0.31<br>(0.29-0.34) | 1.07<br>(0.98-1.18)                         | 0.84<br>(0.67-1.08)                         | 0.38<br>(0.30-0.46)  | 0.78<br>(0.76-0.79) | 1.69<br>(1.34-2.13)                         | 0.80<br>(0.70-0.91)                         |

\*<5 cases in 2x2 table

CI, confidence interval; ICU, intensive care unit; NA, not applicable; sens, sensitivity; spec, specificity

**Table 9** Predictive value for hypotension and/or tachycardia for hospital admission for subgroups: fever, ill appearance, surgical

|                                                         | Fever (n=2,678)     |                      |                                             |                                             | Ill appearance (n=1,436) |                     |                                             |                                             | Surgical (n=1,912)   |                      |                                             |                                             |
|---------------------------------------------------------|---------------------|----------------------|---------------------------------------------|---------------------------------------------|--------------------------|---------------------|---------------------------------------------|---------------------------------------------|----------------------|----------------------|---------------------------------------------|---------------------------------------------|
|                                                         | Sens<br>(95% CI)    | Spec<br>(95% CI)     | Positive<br>likelihood<br>ratio<br>(95% CI) | Negative<br>likelihood<br>ratio<br>(95% CI) | Sens<br>(95% CI)         | Spec<br>(95% CI)    | Positive<br>likelihood<br>ratio<br>(95% CI) | Negative<br>likelihood<br>ratio<br>(95% CI) | Sens<br>(95% CI)     | Spec<br>(95% CI)     | Positive<br>likelihood<br>ratio<br>(95% CI) | Negative<br>likelihood<br>ratio<br>(95% CI) |
| <b>Predictive value for hypotension</b>                 |                     |                      |                                             |                                             |                          |                     |                                             |                                             |                      |                      |                                             |                                             |
| APLS                                                    | 0.06<br>(0.05-0.08) | 0.98<br>(0.97-0.98)  | 2.68<br>(1.8-3.99)                          | 0.96<br>(0.95-0.98)                         | 0.07<br>(0.06-0.09)      | 0.97<br>(0.95-0.98) | 2.16<br>(1.28-3.64)                         | 0.96<br>(0.94-0.98)                         | 0.03<br>(0.02-0.04)  | 0.97<br>(0.96-0.98)  | 1.09<br>(0.63-1.90)                         | 0.99<br>(0.98-1.01)                         |
| PALS / sepsis                                           | 0.02<br>(0.02-0.04) | 0.99<br>(0.99-0.99)  | 5.63<br>(2.44-12.9)                         | 0.98<br>(0.97-0.99)                         | NA*                      | NA*                 | NA*                                         | NA*                                         | NA*                  | NA*                  | NA*                                         | NA*                                         |
| PEWS                                                    | 0.07<br>(0.06-0.09) | 0.96<br>(0.95-0.97)  | 1.89<br>(1.35-2.62)                         | 0.97<br>(0.95-0.99)                         | 0.09<br>(0.07-0.11)      | 0.95<br>(0.93-0.97) | 1.89<br>(1.22-2.95)                         | 0.96<br>(0.93-0.98)                         | 0.05<br>(0.04-0.07)  | 0.97<br>(0.96-0.98)  | 1.81<br>(1.14-2.89)                         | 0.98<br>(0.96-0.99)                         |
| <b>Predictive value for tachycardia</b>                 |                     |                      |                                             |                                             |                          |                     |                                             |                                             |                      |                      |                                             |                                             |
| APLS                                                    | 0.52<br>(0.49-0.55) | 0.71<br>(0.69-0.73)  | 1.79<br>(1.63-1.97)                         | 0.67<br>(0.63-0.72)                         | 0.42<br>(0.39-0.45)      | 0.73<br>(0.68-0.76) | 1.54<br>(1.31-1.80)                         | 0.79<br>(0.74-0.86)                         | 0.07 (0.06-<br>0.09) | 0.97<br>(0.96-0.98)  | 2.53<br>(1.66-3.86)                         | 0.96<br>(0.93-0.98)                         |
| PALS / sepsis                                           | 0.41<br>(0.38-0.44) | 0.74<br>(0.72-0.76)  | 1.59<br>(1.43-1.77)                         | 0.79<br>(0.75-0.84)                         | 0.35<br>(0.32-0.38)      | 0.75<br>(0.71-0.78) | 1.37<br>(1.15-1.63)                         | 0.88<br>(0.82-0.94)                         | 0.09 (0.07-<br>0.11) | 0.95<br>(0.93-0.96)  | 1.73<br>(1.24-2.42)                         | 0.96<br>(0.94-0.99)                         |
| PEWS                                                    | 0.81<br>(0.78-0.83) | 0.33<br>(0.30-0.35)  | 1.19<br>(1.14-1.25)                         | 0.59<br>(0.52-0.69)                         | 0.69<br>(0.67-0.73)      | 0.38<br>(0.34-0.42) | 1.13<br>(1.04-1.22)                         | 0.79<br>(0.68-0.92)                         | 0.28 (0.25-<br>0.31) | 0.85<br>(0.82-0.87)  | 1.83<br>(1.53-2.18)                         | 0.85<br>(0.81-0.89)                         |
| <b>Predictive value for tachycardia AND hypotension</b> |                     |                      |                                             |                                             |                          |                     |                                             |                                             |                      |                      |                                             |                                             |
| APLS                                                    | 0.04<br>(0.03-0.06) | 0.99 (0.99-<br>0.99) | 9.90<br>(4.48-21.9)                         | 0.96<br>(0.95-0.98)                         | NA*                      | NA*                 | NA*                                         | NA*                                         | NA*                  | NA*                  | NA*                                         | NA*                                         |
| PALS / sepsis                                           | NA*                 | NA*                  | NA*                                         | NA*                                         | NA*                      | NA*                 | NA*                                         | NA*                                         | NA*                  | NA*                  | NA*                                         | NA*                                         |
| PEWS                                                    | 0.06<br>(0.05-0.08) | 0.98<br>(0.97-0.98)  | 2.65<br>(1.79-3.93)                         | 0.96<br>(0.94-0.98)                         | 0.07<br>(0.05-0.08)      | 0.98<br>(0.96-0.99) | 3.39<br>(1.76-6.57)                         | 0.98<br>(0.96-0.99)                         | 0.02 (0.01-<br>0.03) | 0.99<br>(0.99-0.99)  | 2.59<br>(1.04-6.47)                         | 0.99<br>(0.98-1.00)                         |
| <b>Predictive value for tachycardia OR hypotension</b>  |                     |                      |                                             |                                             |                          |                     |                                             |                                             |                      |                      |                                             |                                             |
| APLS                                                    | 0.54<br>(0.51-0.57) | 0.69<br>(0.67-0.71)  | 1.65<br>(1.51-1.79)                         | 0.66<br>(0.61-0.72)                         | 0.45<br>(0.42-0.49)      | 0.69<br>(0.65-0.73) | 1.49<br>(1.28-1.73)                         | 0.79<br>(0.72-0.85)                         | 0.09 (0.07-<br>0.12) | 0.95 (0.93-<br>0.96) | 1.75<br>(1.26-2.43)                         | 0.96<br>(0.93-0.98)                         |
| PALS / sepsis                                           | 0.42<br>(0.39-0.45) | 0.74<br>(0.72-0.76)  | 1.60<br>(1.44-1.78)                         | 0.79<br>(0.74-0.83)                         | 0.36<br>(0.33-0.39)      | 0.74<br>(0.70-0.78) | 1.39<br>(1.17-1.65)                         | 0.86 (0.80<br>- 0.93)                       | 0.09 (0.08-<br>0.12) | 0.95 (0.93-<br>0.96) | 1.86<br>(1.35-2.59)                         | 0.95<br>(0.93-0.98)                         |
| PEWS                                                    | 0.81<br>(0.79-0.84) | 0.31<br>(0.29-0.33)  | 1.18<br>(1.13-1.23)                         | 0.59<br>(0.52-0.69)                         | 0.72<br>(0.69-0.75)      | 0.35<br>(0.31-0.39) | 1.12<br>(1.04-1.20)                         | 0.79 (0.67<br>- 0.92)                       | 0.31 (0.28-<br>0.35) | 0.82 (0.80-<br>0.85) | 1.79<br>(1.53-2.12)                         | 0.83<br>(0.78-0.88)                         |

\*<5 cases available in 2x2 table.

CI, confidence interval; NA, not applicable; sens, sensitivity; spec, specificity



**Table 10** Predictive value of shock index for febrile patients (n=2620)

|                           | AUC (95% CI)     | Shock index cut-off* | Sensitivity (95% CI) | Specificity (95% CI) | Positive likelihood ratio (95% CI) | Negative likelihood ratio (95% CI) |
|---------------------------|------------------|----------------------|----------------------|----------------------|------------------------------------|------------------------------------|
| <b>ICU admission</b>      |                  |                      |                      |                      |                                    |                                    |
| 0-2y (n=520)              | 0.59 (0.49-0.69) | 1.54                 | 0.59 (0.44-0.72)     | 0.64 (0.59-0.68)     | 1.63 (1.24-2.13)                   | 0.65 (0.46-0.92)                   |
| 2-10y (n=1497)            | 0.59 (0.52-0.68) | 1.19                 | 0.62 (0.49-0.73)     | 0.62 (0.59-0.64)     | 1.62 (1.31-2.02)                   | 0.62 (0.44-0.87)                   |
| 10-16y (n=661)            | 0.75 (0.63-0.87) | 1.08                 | 0.74 (0.51-0.88)     | 0.75 (0.71-0.78)     | 2.92 (2.16-3.94)                   | 0.35 (0.17-0.75)                   |
| <b>Hospital admission</b> |                  |                      |                      |                      |                                    |                                    |
| 0-2y                      | 0.67 (0.62-0.72) | 1.47                 | 0.60 (0.54-0.66)     | 0.68 (0.62-0.73)     | 1.88 (1.53-2.31)                   | 0.59 (0.49-0.69)                   |
| 2-10y                     | 0.61 (0.58-0.64) | 1.16                 | 0.57 (0.53-0.61)     | 0.63 (0.59-0.66)     | 1.53 (1.37-1.71)                   | 0.69 (0.61-0.77)                   |
| 10-16y                    | 0.63 (0.59-0.68) | 0.95                 | 0.59 (0.54-0.66)     | 0.61 (0.56-0.66)     | 1.53 (1.31-1.79)                   | 0.66 (0.56-0.78)                   |

AUC, area under the curve; CI, confidence interval; ICU, intensive care unit

\*Cut-off value determined by Youden's index

**Table 11** Predictive value of shock index for ill appearance (n=1436)

|                           | AUC              | Shock index cut-off* | Sensitivity (95% CI) | Specificity (95% CI) | Positive likelihood ratio (95% CI) | Negative likelihood ratio (95% CI) |
|---------------------------|------------------|----------------------|----------------------|----------------------|------------------------------------|------------------------------------|
| <b>ICU admission</b>      |                  |                      |                      |                      |                                    |                                    |
| 0-2y (n=337)              | 0.56 (0.49-0.64) | 1.90                 | 0.25 (0.17-0.35)     | 0.88 (0.84-0.92)     | 2.08 (1.26-3.42)                   | 0.86 (0.85-0.97)                   |
| 2-10y (n=682)             | 0.49 (0.40-0.57) | 1.64                 | 0.13 (0.07-0.24)     | 0.95 (0.94-0.97)     | 2.91 (1.39-6.09)                   | 0.91 (0.82-1.01)                   |
| 10-16y (n=417)            | 0.60 (0.50-0.70) | 1.06                 | 0.45 (0.31-0.59)     | 0.79 (0.74-0.83)     | 2.09 (1.44-3.04)                   | 0.70 (0.54-0.91)                   |
| <b>Hospital admission</b> |                  |                      |                      |                      |                                    |                                    |
| 0-2y                      | 0.67 (0.61-0.73) | 1.49                 | 0.55 (0.49-0.61)     | 0.76 (0.65-0.84)     | 2.25 (1.48-3.41)                   | 0.59 (0.49-0.72)                   |
| 2-10y                     | 0.52 (0.48-0.56) | 1.15                 | 0.50 (0.45-0.55)     | 0.58 (0.52-0.63)     | 1.18 (0.99-1.40)                   | 0.87 (0.75-0.99)                   |
| 10-16y                    | 0.57 (0.51-0.62) | 1.06                 | 0.31 (0.25-0.37)     | 0.86 (0.80-0.91)     | 2.24 (1.47-3.41)                   | 0.80 (0.72-0.89)                   |

AUC, area under the curve; CI, confidence interval; ICU, intensive care unit

\*Cut-off value determined by Youden's index

**Table 12** Predictive value of shock index for surgical patients (n=1912)

|                           | AUC              | Shock index cut-off* | Sensitivity (95% CI) | Specificity (95% CI) | Positive likelihood ratio (95% CI) | Negative likelihood ratio (95% CI) |
|---------------------------|------------------|----------------------|----------------------|----------------------|------------------------------------|------------------------------------|
| <b>ICU admission</b>      |                  |                      |                      |                      |                                    |                                    |
| 0-2y (n=230)              | 0.54 (0.39-0.69) | 1.41                 | 0.24 (0.11-0.45)     | 0.89 (0.85-0.93)     | 2.37 (0.99-5.63)                   | 0.85 (0.66-1.08)                   |
| 2-10y (n=965)             | 0.51 (0.43-0.59) | 1.18                 | 0.19 (0.11-0.29)     | 0.93 (0.91-0.95)     | 2.78 (1.61-4.81)                   | 0.87 (0.78-0.98)                   |
| 10-16y (n=717)            | 0.55 (0.46-0.64) | 0.80                 | 0.37 (0.25-0.51)     | 0.76 (0.73-0.79)     | 1.56 (1.07-2.28)                   | 0.82 (0.66-1.02)                   |
| <b>Hospital admission</b> |                  |                      |                      |                      |                                    |                                    |
| 0-2y                      | 0.49 (0.42-0.57) | 0.95                 | 0.85 (0.77-0.90)     | 0.21 (0.14-0.29)     | 1.07 (0.95-1.21)                   | 0.73 (0.42-1.27)                   |
| 2-10y                     | 0.53 (0.49-0.57) | 1.18                 | 0.12 (0.09-0.15)     | 0.96 (0.94-0.97)     | 2.78 (1.73-4.48)                   | 0.92 (0.88-0.96)                   |
| 10-16y                    | 0.54 (0.49-0.59) | 0.80                 | 0.29 (0.24-0.36)     | 0.78 (0.73-0.81)     | 1.33 (1.03-1.72)                   | 0.91 (0.83-0.99)                   |

AUC, area under the curve; CI, confidence interval; ICU, intensive care unit

\*Cut-off value determined by Youden's index

#### References

1. Turner NM, Leroy PL. Advanced paediatric life support. 5th ed: Bohn Stafleu van Loghum; 2017.
2. Parshuram CS, Duncan HP, Joffe AR, *et al.* Multicentre validation of the bedside paediatric early warning system score: a severity of illness score to detect evolving critical illness in hospitalised children. *Crit Care*. 2011;**15**:R184 doi: cc10337 [pii] 10.1186/cc10337 [published Online First: 2011/08/05].
3. Davis AL, Carcillo JA, Aneja RK, *et al.* American College of Critical Care Medicine Clinical Practice Parameters for Hemodynamic Support of Pediatric and Neonatal Septic Shock. *Critical Care Medicine*. 2017;**45**:1061-93 doi: 10.1097/ccm.0000000000002425 [published Online].
